# Supplementary material for: Integrated Analysis of Serum Lymphocytes Develops a Nomogram for Predicting Prognosis of Intracranial Germ Cell Tumors to Chemo-Radiotherapy
Source: Research Square preprint supplement (doi:10.21203/rs.3.rs-1447293/v1), 2022-03-16
Supplement: Supplementary file 1 [file e3794ec900b94e63e3277e2e.xlsx]

## Sheet: Sheet1
Pattern of Treatment		No.	%
Comprehensive Therapy	Surgically removed+Chemotherapy+Radiotherapy	51	0.352
	Ventricle-abdominal shunt+Chemotherapy+Radiotherapy	15	0.103
	Gamma knife+Chemothrapy+Radiotherapy	6	0.041
	Chemotherapy+Radiotherapy	51	0.352
	Surgically removed+Chemotherapy	11	0.076
	Chemotherapy	11	0.076
Pattern of Chemotherapy	BEP	40	0.276
	EP	69	0.476
	Combination of BEP/EP/IEP/TMZ/AVASTIN	34	0.234
	IEP	2	0.014
Pattern of Radiotherapy	CSI+boost	60	0.410959
	WBNT+boost	23	0.157534
	Local radiotherapy	4	0.0273973
	No radiation	21	0.143836
	Not recorded	39	0.267123
At least 4-6 courses of Chemo	Yes	89	0.614
	No	56	0.386
Combination of Radiotherapy	Yes	122	0.841
	No	23	0.159
Replase	Yes	19	0.131
	No	126	0.869
Outcomes of treatments	CR	17	0.117
	PR	87	0.6
	SD	34	0.234
	PD	7	0.048
